# Supplementary material for: Facile C–N coupling of coordinated ammonia and labile carbonyl or acetonitrile promoted by a thiolate-bridged dicobalt reaction scaffold
Source: Royal Society of Chemistry journal article supplement (doi:10.1039/d0dt02133d), 2020-01-01

## Electronic Supplementary Information

### **Facile C–N coupling of coordinated ammonia and labile carbonyl or acetonitrile promoted by a thiolate-bridged dicobalt reaction scaffold**

Jianzhe Li,<sup>a</sup> Dawei Yang,<sup>\*a</sup> Peng Tong,<sup>a</sup> Baomin Wang<sup>a</sup> and Jingping Qu<sup>\*ab</sup>

<sup>a</sup>*State Key Laboratory of Fine Chemicals, Dalian University of Technology, Dalian 116024, P. R. China*

<sup>b</sup>*Key Laboratory for Advanced Materials, East China University of Science and Technology, Shanghai 200237, P. R. China*

\*E-mail: qujp@dlut.edu.cn

yangdw@dlut.edu.cn

## Table of Contents

|                                      |     |
|--------------------------------------|-----|
| I. X-ray crystallographic data ..... | S3  |
| II. NMR spectra .....                | S9  |
| III. ESI-HRMS .....                  | S14 |
| IV. IR spectra .....                 | S22 |

## I. X-ray crystallographic data

**Table S1** Crystallographic data for **2** and **3**·2CH<sub>2</sub>Cl<sub>2</sub>.

|                                                                         | <b>2</b>                                                          | <b>3</b> ·2CH <sub>2</sub> Cl <sub>2</sub>                                                     |
|-------------------------------------------------------------------------|-------------------------------------------------------------------|------------------------------------------------------------------------------------------------|
| Formula                                                                 | C <sub>25</sub> H <sub>42</sub> Co <sub>2</sub> INOS <sub>2</sub> | C <sub>26</sub> H <sub>47</sub> Cl <sub>4</sub> Co <sub>2</sub> I <sub>2</sub> NS <sub>2</sub> |
| Formula weight                                                          | 681.47                                                            | 951.22                                                                                         |
| Crystal dimensions (mm <sup>3</sup> )                                   | 0.28×0.26×0.25                                                    | 0.30×0.24×0.23                                                                                 |
| Crystal system                                                          | Triclinic                                                         | Monoclinic                                                                                     |
| Space group                                                             | P-1                                                               | P2(1)/n                                                                                        |
| a (Å)                                                                   | 8.5554(4)                                                         | 12.1666(5)                                                                                     |
| b (Å)                                                                   | 11.8305(5)                                                        | 15.2586(6)                                                                                     |
| c (Å)                                                                   | 14.1576(6)                                                        | 19.7131(7)                                                                                     |
| α (°)                                                                   | 75.2970(14)                                                       | 90                                                                                             |
| β (°)                                                                   | 86.9868(14)                                                       | 93.8173(10)                                                                                    |
| γ (°)                                                                   | 88.2112(13)                                                       | 90                                                                                             |
| Volume (Å <sup>3</sup> )                                                | 1383.88(11)                                                       | 3651.5(2)                                                                                      |
| Z                                                                       | 2                                                                 | 4                                                                                              |
| T (K)                                                                   | 173(2)                                                            | 173(2)                                                                                         |
| D <sub>calcd</sub> (g cm <sup>-3</sup> )                                | 1.635                                                             | 1.730                                                                                          |
| μ (mm <sup>-1</sup> )                                                   | 2.483                                                             | 3.024                                                                                          |
| F (000)                                                                 | 692                                                               | 1880                                                                                           |
| No. of rflns. collected                                                 | 17695                                                             | 76910                                                                                          |
| No. of indep. rflns. /R <sub>int</sub>                                  | 4828/0.0334                                                       | 6413/0.0278                                                                                    |
| No. of obsd. rflns. [I <sub>0</sub> > 2σ(I <sub>0</sub> )]              | 4629                                                              | 5928                                                                                           |
| Data / restraints / parameters                                          | 4828/0/297                                                        | 6413/0/346                                                                                     |
| R <sub>1</sub> / wR <sub>2</sub> [I <sub>0</sub> > 2σ(I <sub>0</sub> )] | 0.0277/0.0755                                                     | 0.0305/0.0852                                                                                  |
| R <sub>1</sub> / wR <sub>2</sub> (all data)                             | 0.0288/0.0764                                                     | 0.0341/0.0878                                                                                  |
| GOF (on F <sup>2</sup> )                                                | 0.924                                                             | 1.062                                                                                          |
| Largest diff. peak and hole (e Å <sup>-3</sup> )                        | 0.651/-0.650                                                      | 0.958/-1.614                                                                                   |
| CCDC No.                                                                | 1990564                                                           | 1990565                                                                                        |

**Table S2** Crystallographic data for **4·MeCN** and **5**.

|                                                  | <b>4·MeCN</b>                                                                                                | <b>5</b>                                                                                      |
|--------------------------------------------------|--------------------------------------------------------------------------------------------------------------|-----------------------------------------------------------------------------------------------|
| Formula                                          | C <sub>28</sub> H <sub>49</sub> Co <sub>2</sub> F <sub>12</sub> N <sub>3</sub> P <sub>2</sub> S <sub>2</sub> | C <sub>26</sub> H <sub>45</sub> Co <sub>2</sub> F <sub>6</sub> N <sub>2</sub> PS <sub>2</sub> |
| Formula weight                                   | 899.62                                                                                                       | 712.59                                                                                        |
| Crystal dimensions (mm <sup>3</sup> )            | 0.28×0.25×0.24                                                                                               | 0.32×0.28×0.26                                                                                |
| Crystal system                                   | Orthorhombic                                                                                                 | Monoclinic                                                                                    |
| Space group                                      | Pbca                                                                                                         | P2(1)/n                                                                                       |
| a (Å)                                            | 17.1790(8)                                                                                                   | 8.565(2)                                                                                      |
| b (Å)                                            | 14.6705(7)                                                                                                   | 28.994(7)                                                                                     |
| c (Å)                                            | 30.3404(14)                                                                                                  | 12.607(3)                                                                                     |
| $\alpha$ (°)                                     | 90                                                                                                           | 90                                                                                            |
| $\beta$ (°)                                      | 90                                                                                                           | 92.037(5)                                                                                     |
| $\gamma$ (°)                                     | 90                                                                                                           | 90                                                                                            |
| Volume (Å <sup>3</sup> )                         | 7646.5(6)                                                                                                    | 3128.9(13)                                                                                    |
| Z                                                | 8                                                                                                            | 4                                                                                             |
| T (K)                                            | 173(2)                                                                                                       | 296(2)                                                                                        |
| $D_{\text{calcd}}$ (g cm <sup>-3</sup> )         | 1.563                                                                                                        | 1.513                                                                                         |
| $\mu$ (mm <sup>-1</sup> )                        | 1.144                                                                                                        | 1.300                                                                                         |
| $F(000)$                                         | 3696                                                                                                         | 1480                                                                                          |
| No. of rflns. collected                          | 56387                                                                                                        | 54174                                                                                         |
| No. of indep. rflns. / $R_{\text{int}}$          | 9007/0.0543                                                                                                  | 5508/0.0284                                                                                   |
| No. of obsd. rflns. [ $I_0 > 2\sigma(I_0)$ ]     | 7527                                                                                                         | 4982                                                                                          |
| Data / restraints / parameters                   | 9007/0/456                                                                                                   | 5508/0/344                                                                                    |
| $R_1 / wR_2$ [ $I_0 > 2\sigma(I_0)$ ]            | 0.0548/0.1508                                                                                                | 0.0415/0.1110                                                                                 |
| $R_1 / wR_2$ (all data)                          | 0.0661/0.1588                                                                                                | 0.0467/0.1138                                                                                 |
| GOF (on $F^2$ )                                  | 1.025                                                                                                        | 1.019                                                                                         |
| Largest diff. peak and hole (e Å <sup>-3</sup> ) | 1.336/−0.979                                                                                                 | 0.675/−0.482                                                                                  |
| CCDC No.                                         | 1990566                                                                                                      | 1990567                                                                                       |

**Fig. S1** ORTEP diagram of **2**. The thermal ellipsoids were shown at 50% probability level. Hydrogen atoms on carbons and one I anion are omitted for clarity.

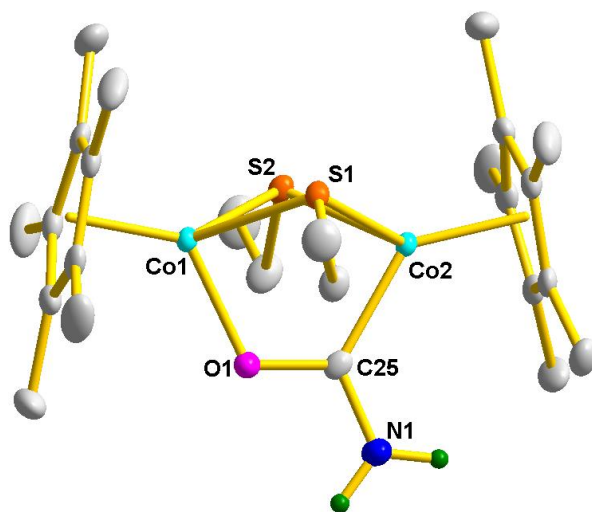

**Table S3** Selected bond distances (Å) and angles (°) for **2**.

| Distances (Å)       |            |            |            |
|---------------------|------------|------------|------------|
| Co1···Co2           | 3.0888(1)  | Co1–S1     | 2.2543(7)  |
| Co1–S2              | 2.2664(7)  | Co2–S1     | 2.2308(7)  |
| Co2–S2              | 2.2440(7)  | Co1–O1     | 1.9401(19) |
| Co2–C25             | 1.926(3)   | C25–O1     | 1.284(3)   |
| C25–N1              | 1.329(4)   | Co1–Cp*1   | 1.6851(1)  |
| Co2–Cp*2            | 1.7117(1)  |            |            |
| Angles (°)          |            |            |            |
| Co1–S1–Co2          | 87.05(3)   | Co1–S2–Co2 | 86.44(3)   |
| S1–Co1–S2           | 81.80(3)   | S1–Co2–S2  | 82.82(3)   |
| Co1–O1–C25          | 115.92(17) | Co2–C25–N1 | 126.5(2)   |
| Co2–C25–O1          | 119.8(2)   | N1–C25–O1  | 113.8(3)   |
| Torsion angles (°)  |            |            |            |
| S1–Co1Co2–S2        | 129.736(2) |            |            |
| Dihedral angles (°) |            |            |            |
| Cp*1–Cp*2           | 23.529     |            |            |

**Fig. S2** ORTEP diagram of  $3 \cdot 2\text{CH}_2\text{Cl}_2$ . The thermal ellipsoids were shown at 50% probability level. Hydrogen atoms on carbons, two co-crystallized  $\text{CH}_2\text{Cl}_2$  molecules and one I anion are omitted for clarity.

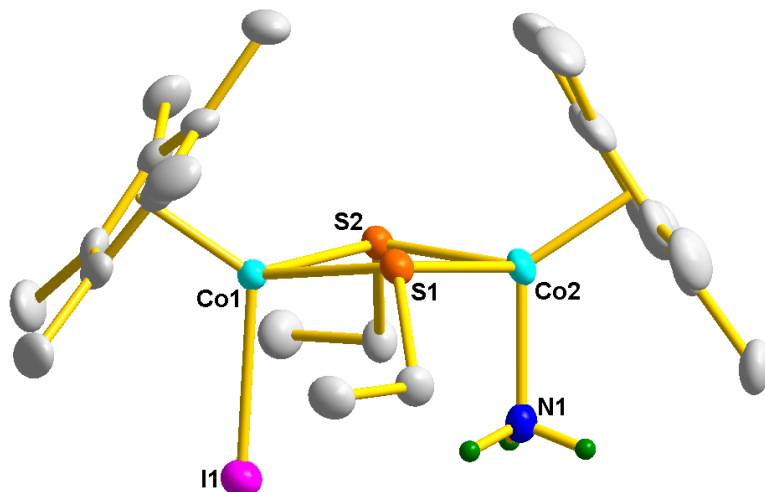

**Table S4** Selected bond distances (Å) and angles (°) for  $3 \cdot 2\text{CH}_2\text{Cl}_2$ .

| Distances (Å)       |            |            |            |
|---------------------|------------|------------|------------|
| Co1···Co2           | 3.4102(1)  | Co1–S1     | 2.2773(10) |
| Co1–S2              | 2.2631(10) | Co2–S1     | 2.2633(10) |
| Co2–S2              | 2.2534(10) | Co1–I1     | 2.5883(5)  |
| Co2–N1              | 1.976(3)   | Co1–Cp*1   | 1.7231(1)  |
| Co2–Cp*2            | 1.7060(1)  |            |            |
| Angles (°)          |            |            |            |
| Co1–S1–Co2          | 97.36(4)   | Co1–S2–Co2 | 98.06(4)   |
| S2–Co1–S1           | 81.11(3)   | S1–Co2–S2  | 81.62(3)   |
| Torsion angles (°)  |            |            |            |
| S1–Co1Co2–S2        | 164.402(2) |            |            |
| Dihedral angles (°) |            |            |            |
| Cp*1–Cp*2           | 69.021     |            |            |

**Fig. S3** ORTEP diagram of **4**·MeCN. The thermal ellipsoids shown were at 50% probability level. Hydrogen atoms on carbons, one co-crystallized MeCN molecule and two PF<sub>6</sub> anions are omitted for clarity.

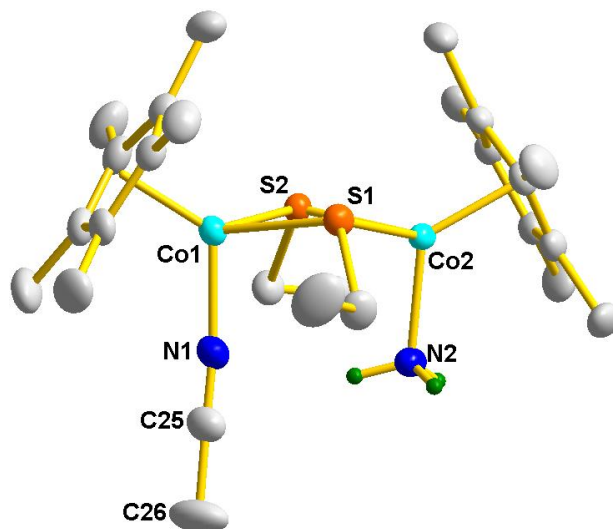

**Table S5** Selected bond distances (Å) and angles (°) for **4**·MeCN.

| Distances (Å)       |            |            |           |
|---------------------|------------|------------|-----------|
| Co1···Co2           | 3.3949(1)  | Co1–S1     | 2.2605(9) |
| Co1–S2              | 2.2535(9)  | Co2–S1     | 2.2605(9) |
| Co2–S2              | 2.2626(9)  | Co1–N1     | 1.923(3)  |
| Co2–N2              | 1.987(3)   | N1–C25     | 1.142(5)  |
| Co1–Cp*1            | 1.7061(1)  | Co2–Cp*2   | 1.7039(1) |
| Angles (°)          |            |            |           |
| Co1–S1–Co2          | 97.34(3)   | Co1–S2–Co2 | 97.48(3)  |
| S2–Co1–S1           | 80.47(3)   | S1–Co2–S2  | 80.28(3)  |
| Co1–N1–C25          | 173.4(3)   |            |           |
| Torsion angles (°)  |            |            |           |
| S1–Co1Co2–S2        | 155.837(3) |            |           |
| Dihedral angles (°) |            |            |           |
| Cp*1–Cp*2           | 61.921     |            |           |

**Fig. S4** ORTEP diagram of **5**. The thermal ellipsoids were shown at 50% probability level. Hydrogen atoms on carbons and one PF<sub>6</sub> anion are omitted for clarity.

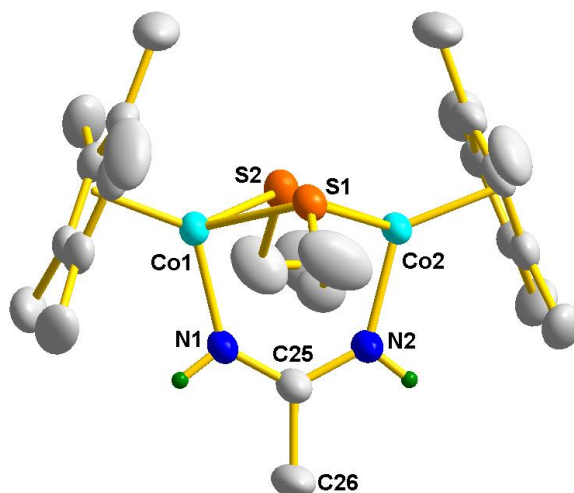

**Table S6** Selected bond distances (Å) and angles (°) for **5**.

| Distances (Å)       |             |            |            |
|---------------------|-------------|------------|------------|
| Co1···Co2           | 3.2296(5)   | Co1–S1     | 2.2446(10) |
| Co1–S2              | 2.2454(10)  | Co2–S1     | 2.2576(10) |
| Co2–S2              | 2.2458(10)  | Co1–N1     | 1.924(3)   |
| Co2–N2              | 1.920(3)    | N1–C25     | 1.305(4)   |
| N2–C25              | 1.320(4)    | C25–C26    | 1.506(5)   |
| Co1–Cp*1            | 1.6977(3)   | Co2–Cp*2   | 1.7065(3)  |
| Angles (°)          |             |            |            |
| Co1–S1–Co2          | 91.67(3)    | Co1–S2–Co2 | 91.96(4)   |
| S2–Co1–S1           | 82.50(3)    | S1–Co2–S2  | 82.20(3)   |
| Co1–N1–C25          | 132.6(3)    | Co2–N2–C25 | 131.8(3)   |
| N1–C25–N2           | 123.3(3)    | N1–C25–C26 | 118.6(3)   |
| N2–C25–C26          | 118.1(3)    |            |            |
| Torsion angles (°)  |             |            |            |
| S1–Co1Co2–S2        | 142.215(11) |            |            |
| Dihedral angles (°) |             |            |            |
| Cp*1–Cp*2           | 42.786      |            |            |



## II. NMR spectra

Fig. S5 The  $^1\text{H}$  NMR spectrum of **2** in  $\text{CD}_2\text{Cl}_2$ .

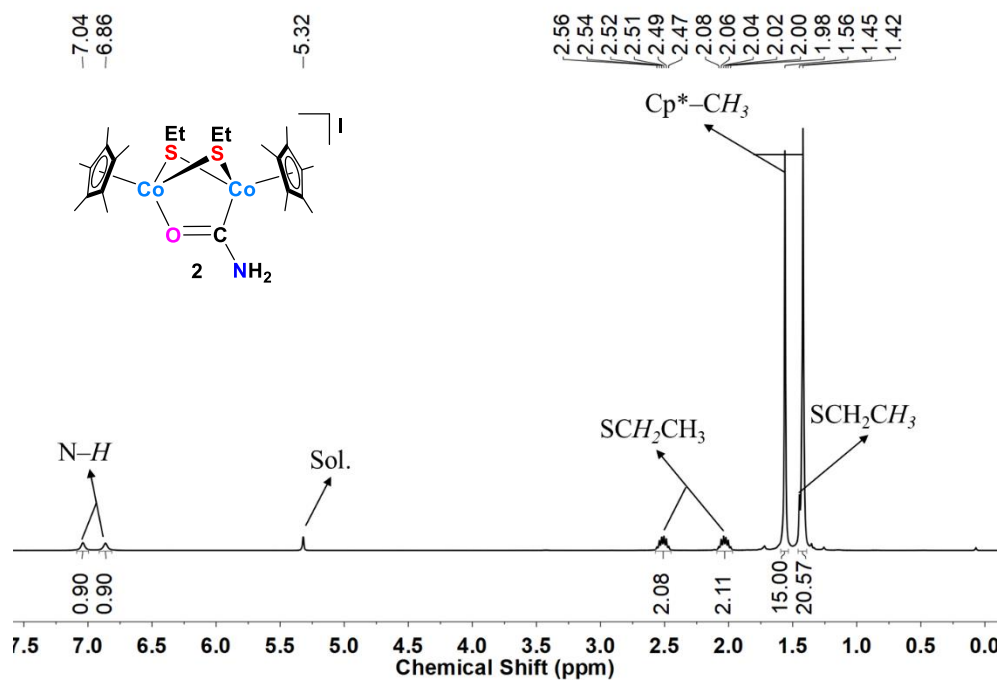

Fig. S6 The  $^{13}\text{C}$  NMR spectrum of **2** in  $\text{CD}_2\text{Cl}_2$ .

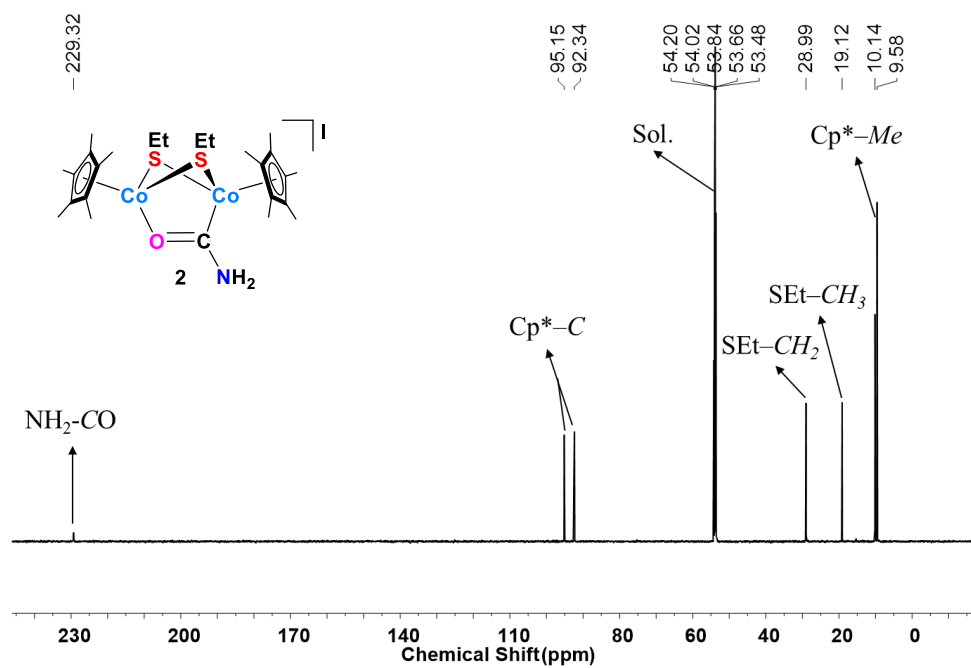

**Fig. S7** The  $^1\text{H}$  NMR spectrum of **3** in  $\text{CD}_2\text{Cl}_2$ .

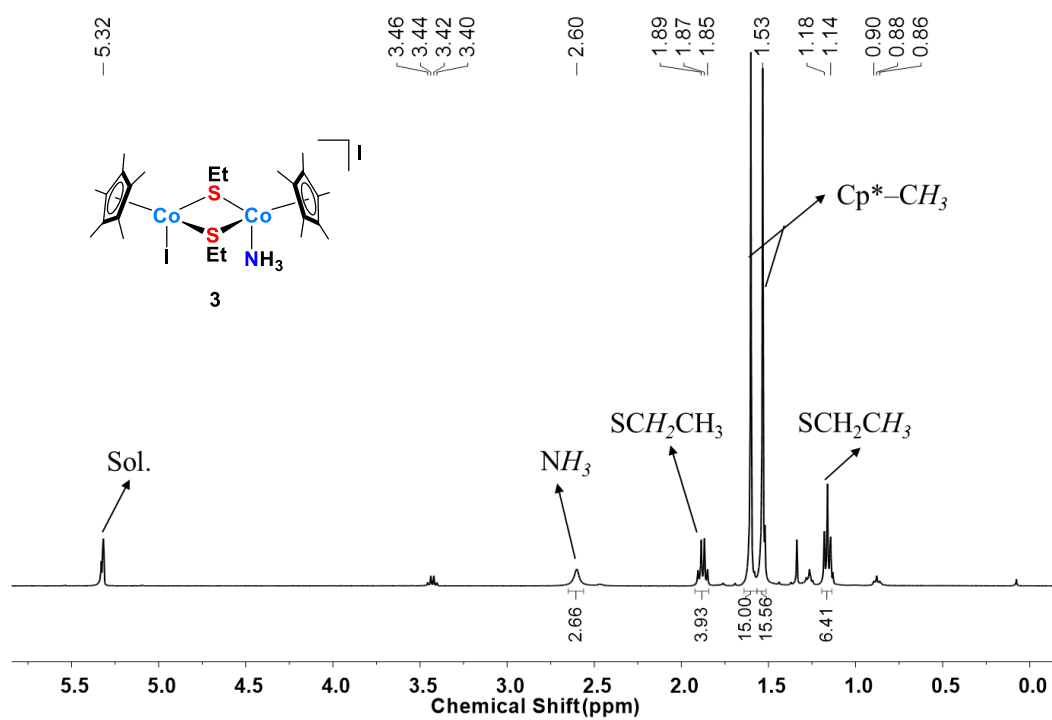

**Fig. S8** The  $^{13}\text{C}$  NMR spectrum of **3** in  $\text{CD}_2\text{Cl}_2$ .

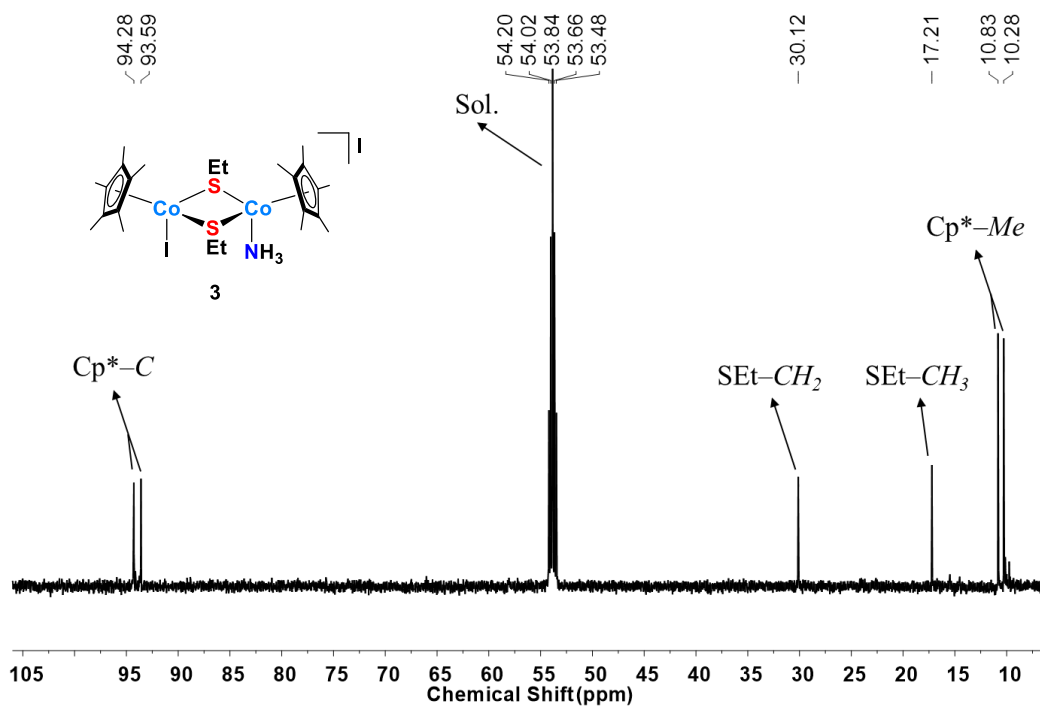

**Fig. S9** The  $^1\text{H}$  NMR spectrum of **4** in  $\text{CD}_2\text{Cl}_2$ .

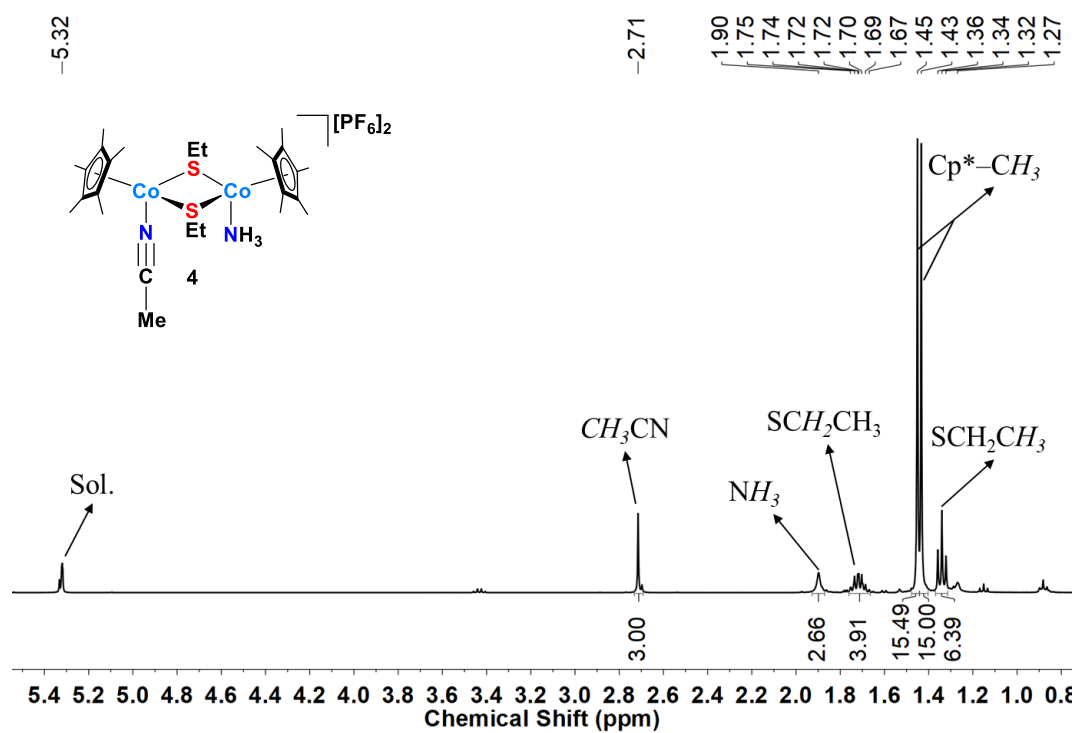

**Fig. S10** The  $^1\text{H}$  NMR spectrum of D-4 in  $\text{CD}_2\text{Cl}_2$ .

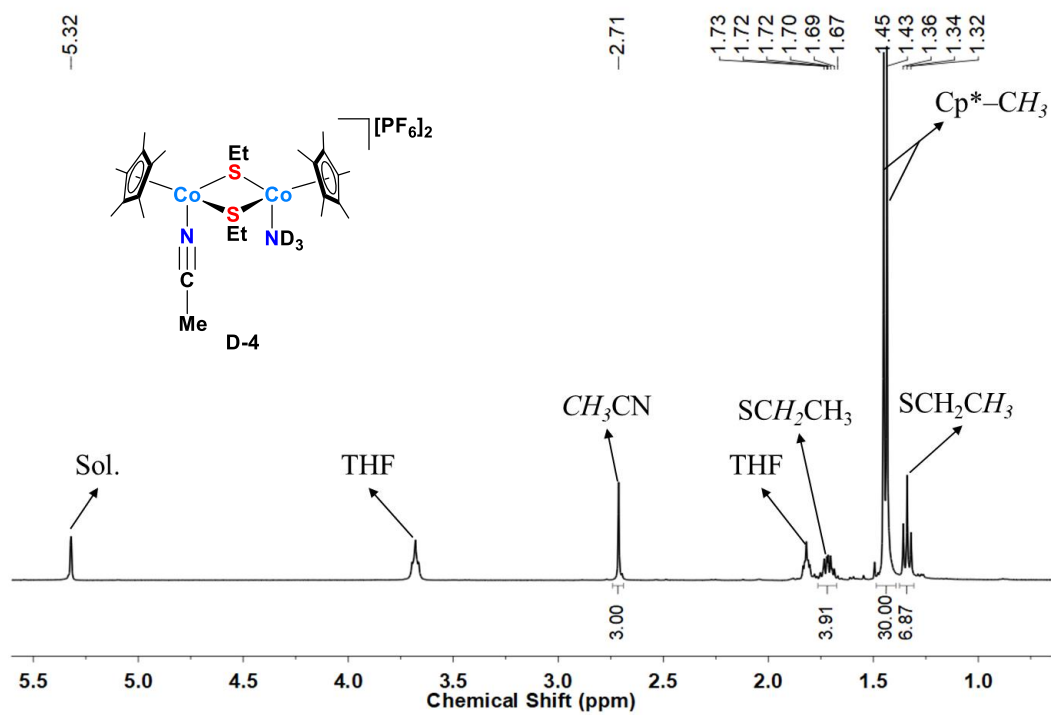

**Fig. S11** The  $^{13}\text{C}$  NMR spectrum of **4** in  $\text{CD}_2\text{Cl}_2$ .

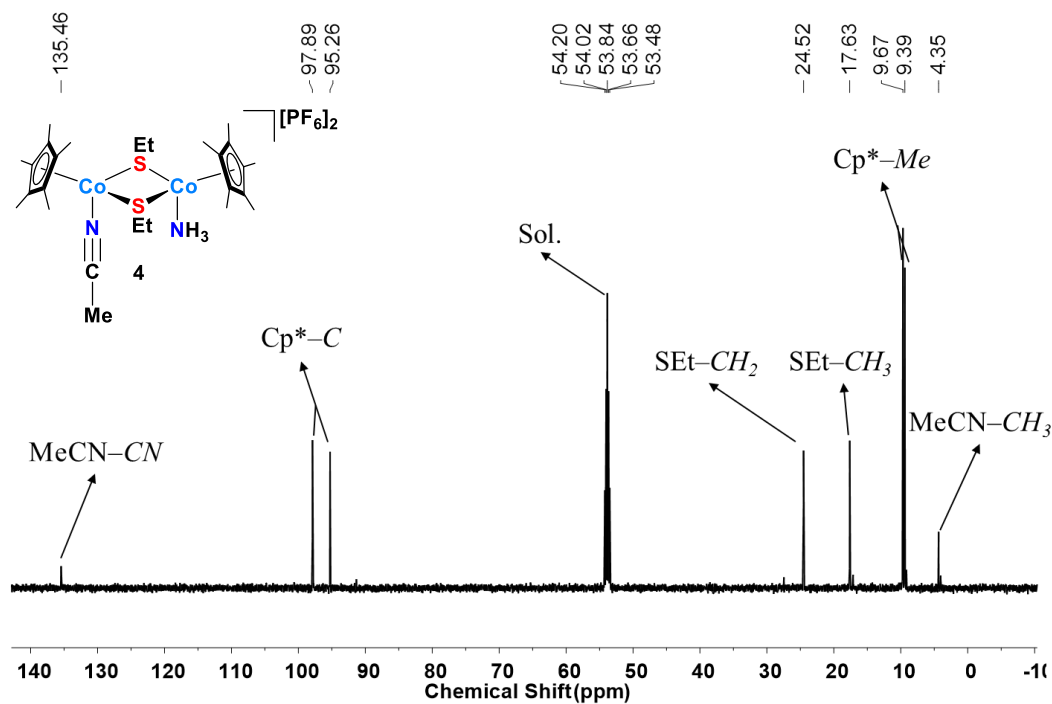

**Fig. S12** The  $^1\text{H}$  NMR spectrum of **5** in  $\text{CD}_2\text{Cl}_2$ .

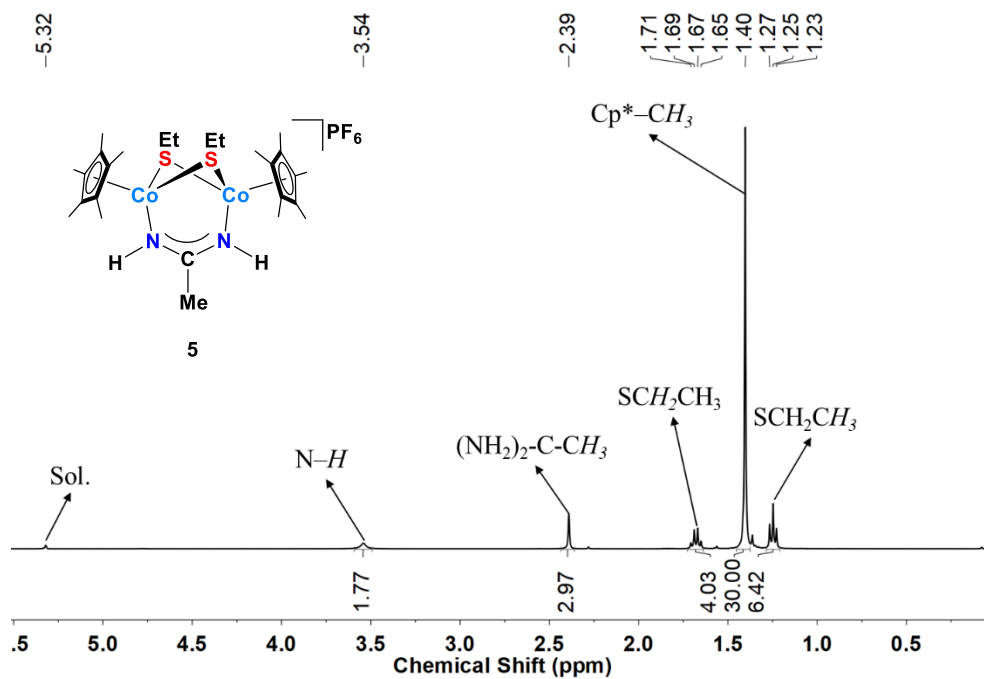

**Fig. S13** The  $^{13}\text{C}$  NMR spectrum of **5** in  $\text{CD}_2\text{Cl}_2$ .

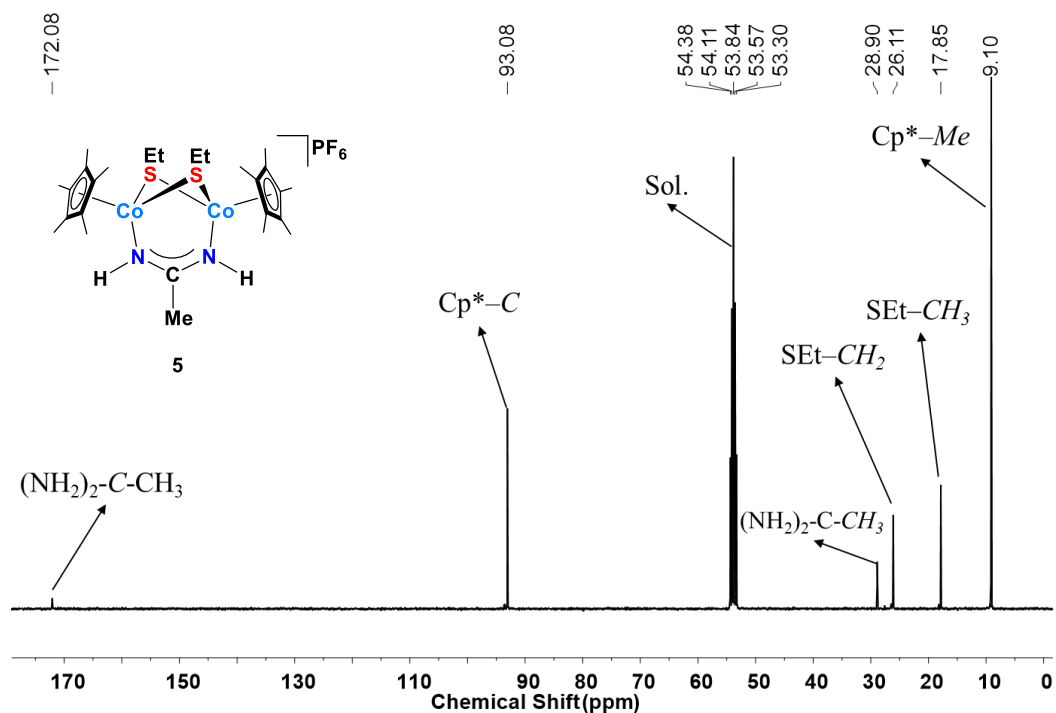

**Fig. S14** The  $^1\text{H}$  NMR spectrum of the product from the reaction of complex **5** with  $\text{HBF}_4$  in  $\text{CD}_2\text{Cl}_2$ .

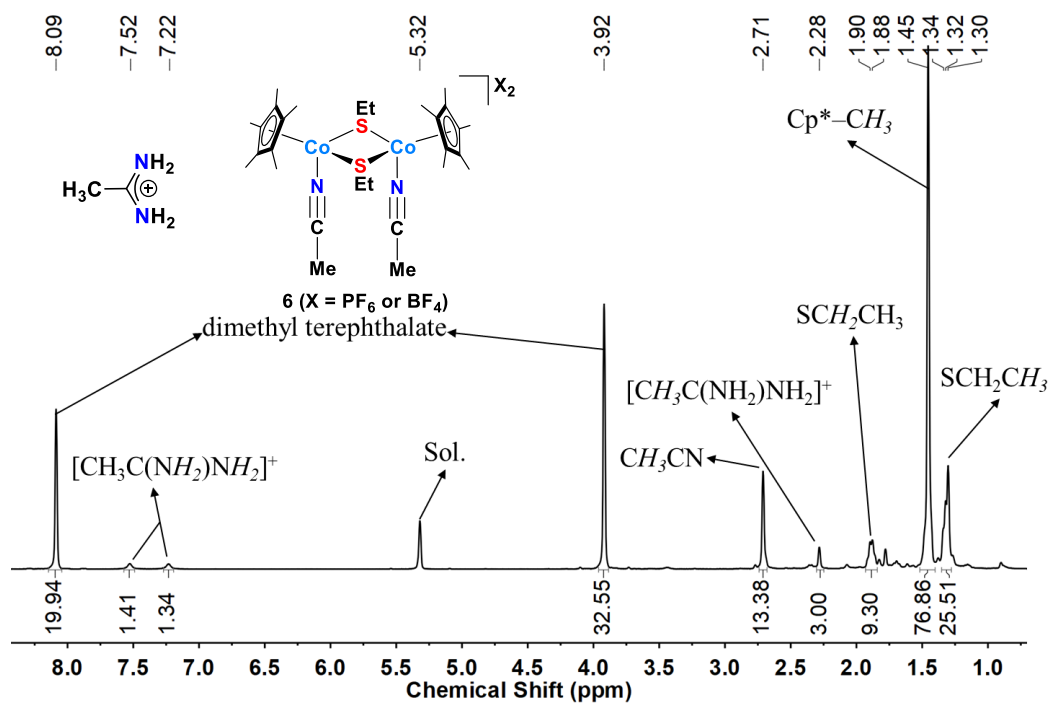

### III. ESI-HRMS

**Fig. S15** ESI-HRMS of **2** in CH<sub>2</sub>Cl<sub>2</sub>.

(a) The signal at  $m/z = 554.1376$  corresponds to  $[2-I]^+$ . (b) Calculated isotopic distribution for  $[2-I]^+$  (upper) and the amplifying diagram for  $[2-I]^+$  (bottom).

(a)

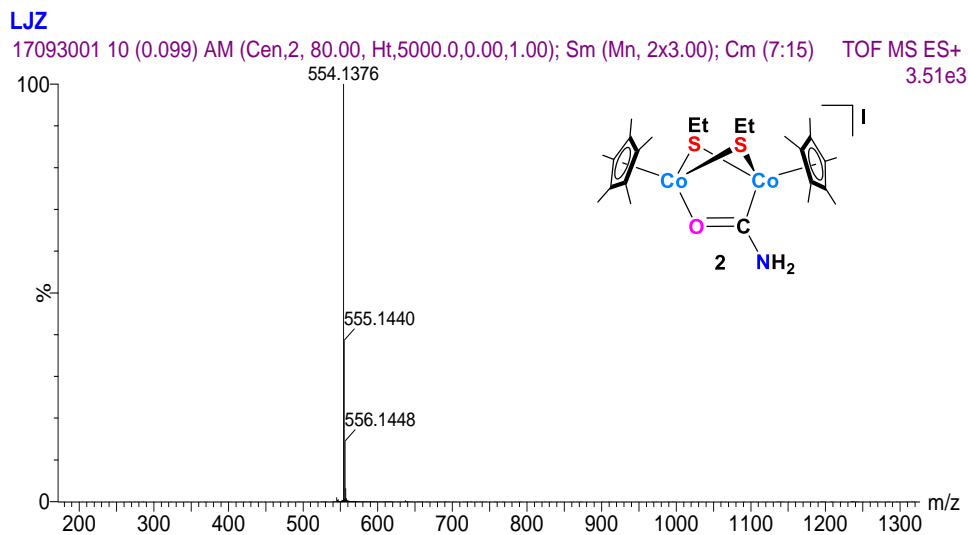

(b)

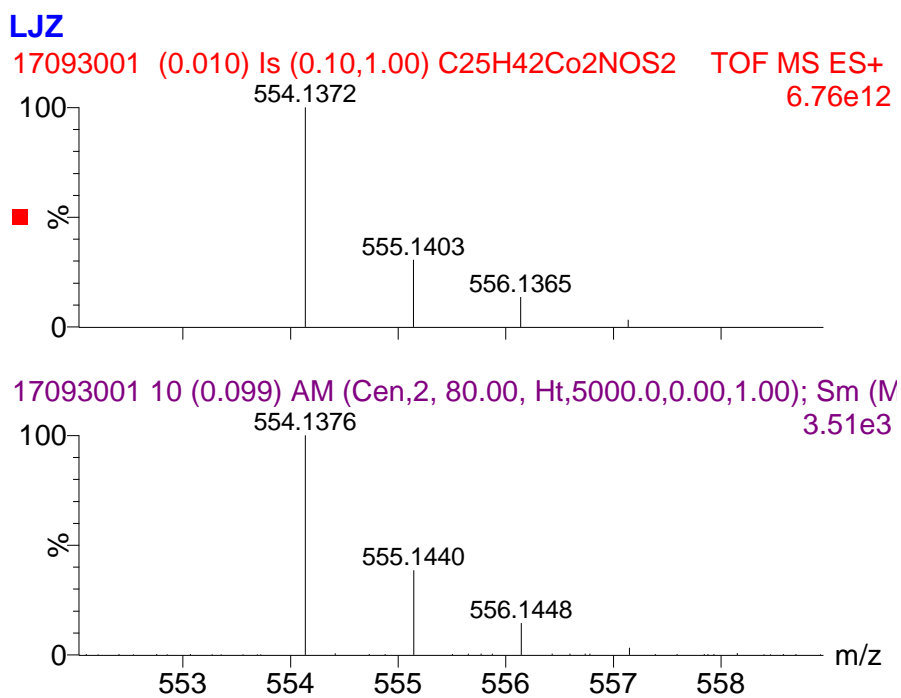

**Fig. S16** ESI-HRMS of **3** in CH<sub>2</sub>Cl<sub>2</sub>.

(a) The signals at  $m/z = 654.0547$  and  $637.0283$  correspond to  $[\mathbf{3-I}]^+$  and  $[\mathbf{3-I-NH}_3]^+$ , respectively. (b) Calculated isotopic distribution for  $[\mathbf{3-I}]^+$  (upper) and the amplifying diagram for  $[\mathbf{3-I}]^+$  (bottom). (c) Calculated isotopic distribution for  $[\mathbf{3-I-NH}_3]^+$  (upper) and the amplifying diagram for  $[\mathbf{3-I-NH}_3]^+$  (bottom).

(a)

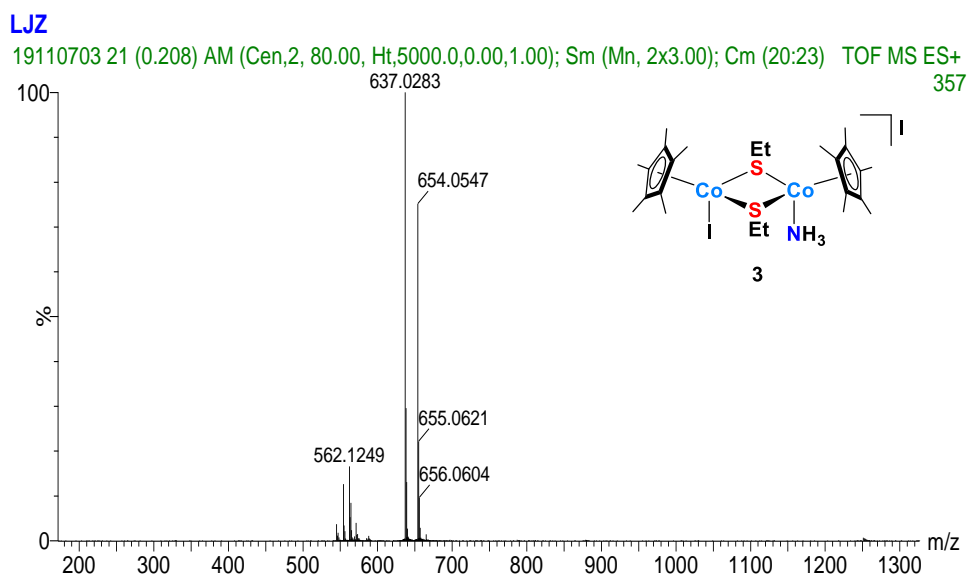

(b)

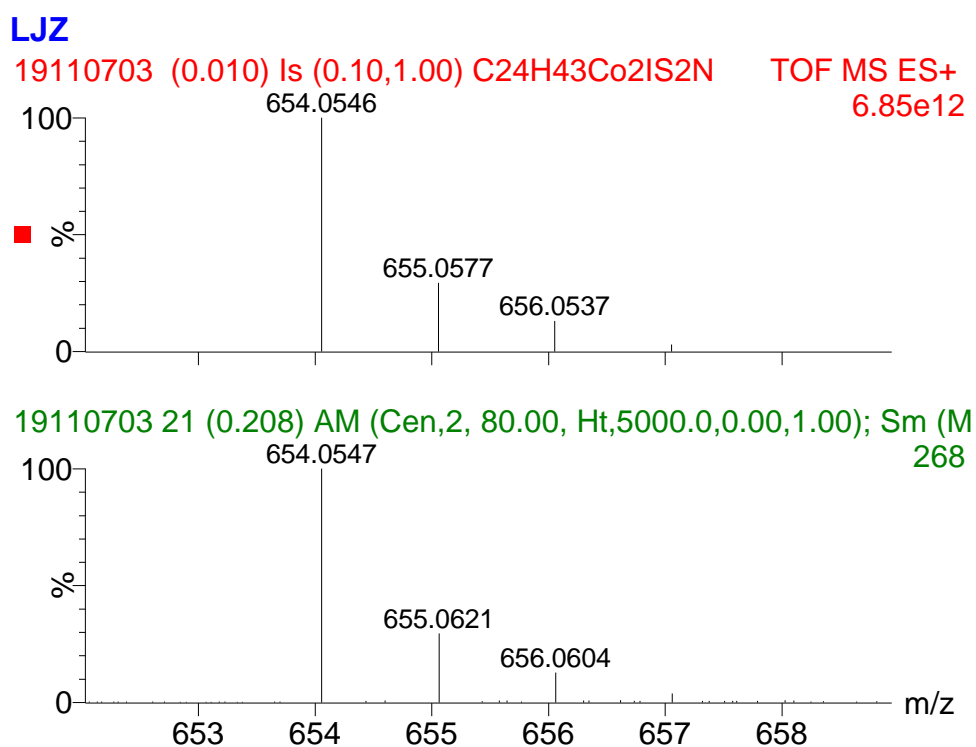

(c)

**LJZ**

19110703 (0.010) Is (0.10,1.00) C<sub>24</sub>H<sub>40</sub>Co<sub>2</sub>IS<sub>2</sub>

TOF MS ES+  
6.88e12

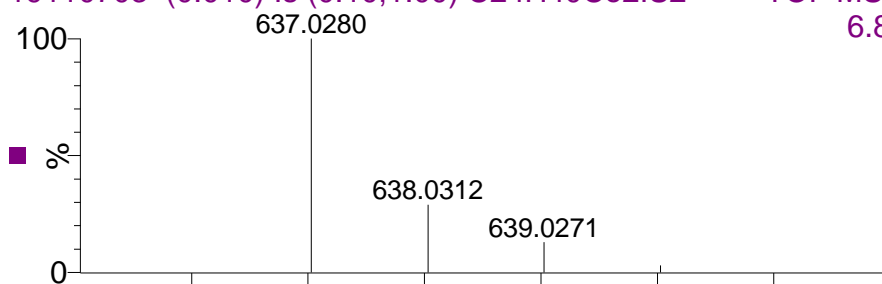

19110703 21 (0.208) AM (Cen,2, 80.00, Ht,5000.0,0.00,1.00); Sm (M 357

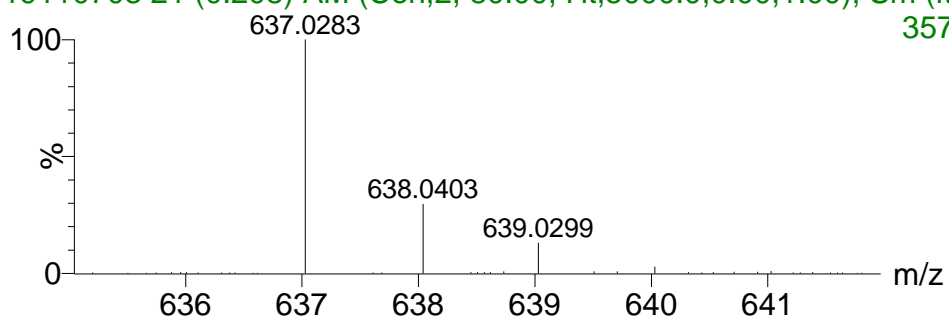



**Fig. S17** ESI-HRMS of D-3 in CH<sub>2</sub>Cl<sub>2</sub>.

(a) The signal at  $m/z = 657.0740$  corresponds to [D-3-I]<sup>+</sup>. (b) Calculated isotopic distribution for [D-3-I]<sup>+</sup> (upper) and the amplifying diagram for [D-3-I]<sup>+</sup> (bottom).

(a)

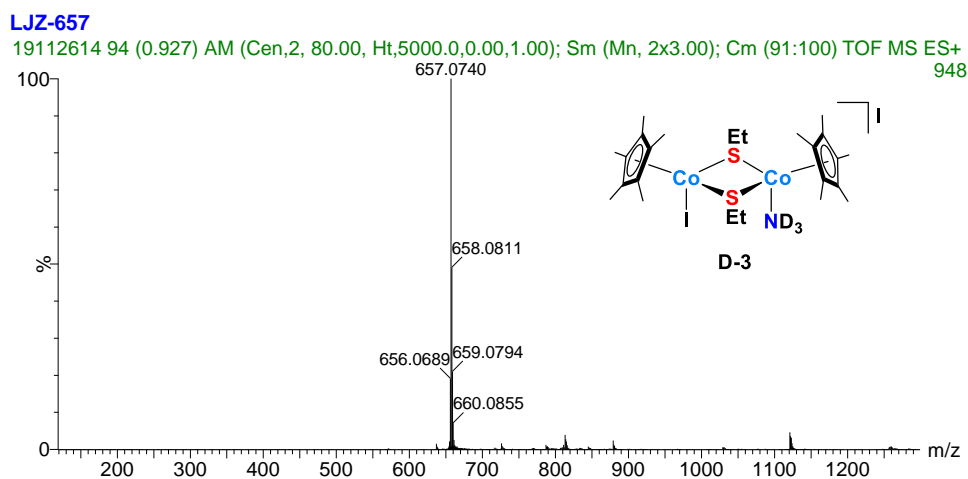

(b)

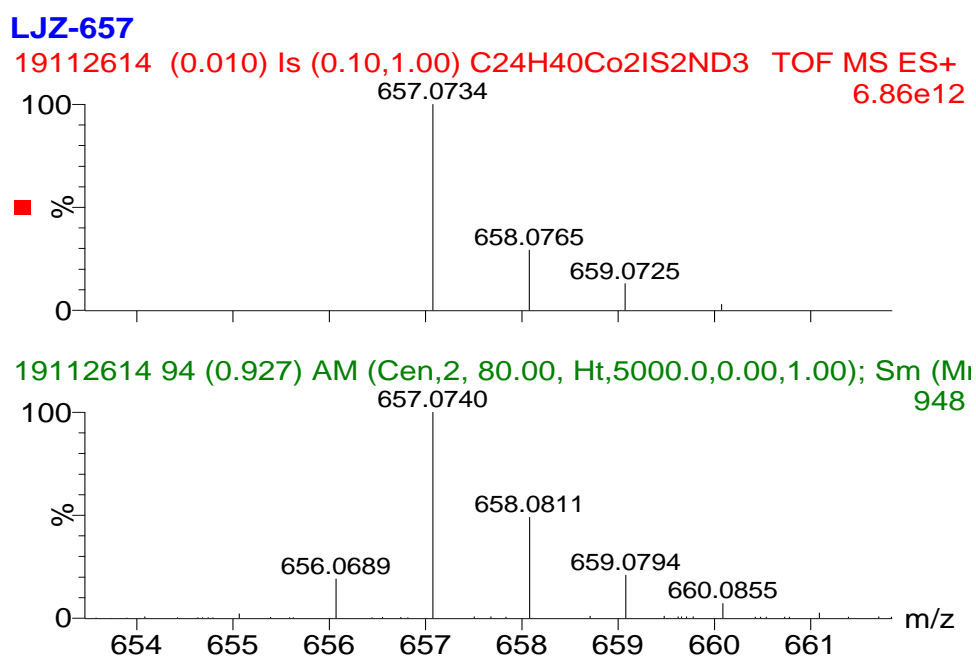

**Fig. S18** ESI-HRMS of **4** in CH<sub>2</sub>Cl<sub>2</sub>.

(a) The signals at  $m/z = 284.0881$ ,  $275.5739$  and  $255.0619$  correspond to  $[\mathbf{4}-2(\text{PF}_6)]^{2+}$ ,  $[\mathbf{4}-2(\text{PF}_6)-\text{NH}_3]^{2+}$  and  $[\mathbf{4}-2(\text{PF}_6)-\text{NH}_3-\text{MeCN}]^{2+}$ . (b) Calculated isotopic distribution for  $[\mathbf{4}-2(\text{PF}_6)]^{2+}$  (upper) and the amplifying diagram for  $[\mathbf{4}-2(\text{PF}_6)]^{2+}$  (bottom). (c) Calculated isotopic distribution for  $[\mathbf{4}-2(\text{PF}_6)-\text{NH}_3]^{2+}$  (upper) and the amplifying diagram for  $[\mathbf{4}-2(\text{PF}_6)-\text{NH}_3]^{2+}$  (bottom). (d) Calculated isotopic distribution for  $[\mathbf{4}-2(\text{PF}_6)-\text{NH}_3-\text{MeCN}]^{2+}$  (upper) and the amplifying diagram for  $[\mathbf{4}-2(\text{PF}_6)-\text{NH}_3-\text{MeCN}]^{2+}$  (bottom).

(a)

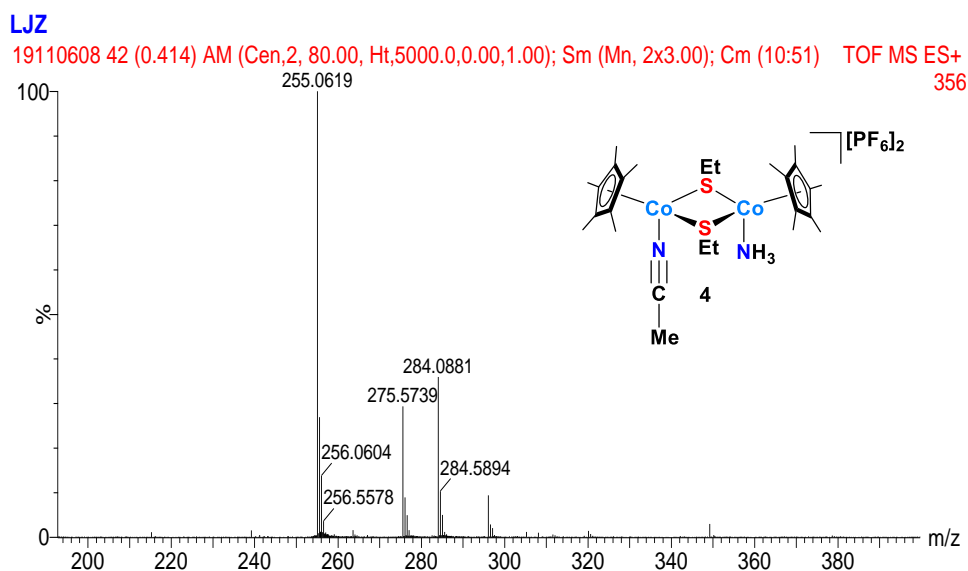

(b)

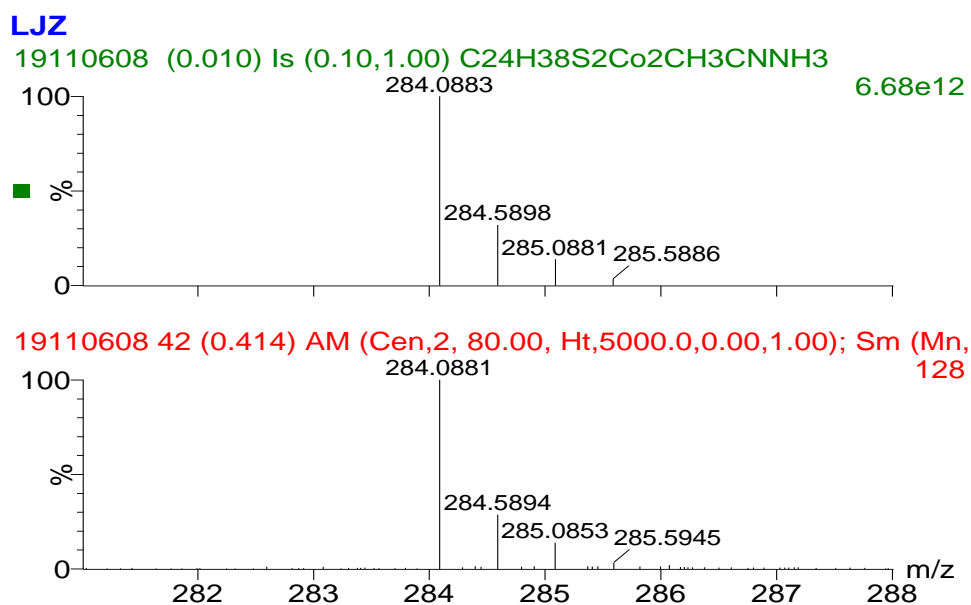

(c)

**LJZ**

19110608 (0.010) Is (0.10,1.00) C<sub>24</sub>H<sub>38</sub>S<sub>2</sub>Co<sub>2</sub>CH<sub>3</sub>CN TOF MS ES+ 6.71e12

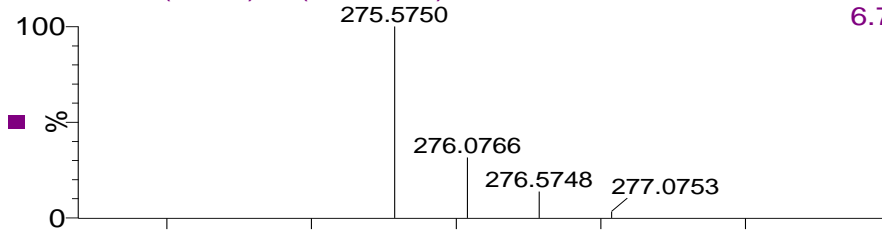

19110608 42 (0.414) AM (Cen,2, 80.00, Ht,5000.0,0.00,1.00); Sm (Mn, 105

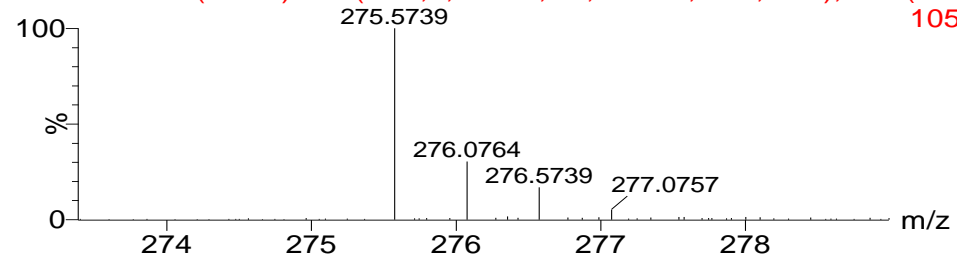

(d)

**LJZ**

19110608 (0.010) Is (0.10,1.00) C<sub>24</sub>H<sub>38</sub>S<sub>2</sub>Co<sub>2</sub> TOF MS ES+ 6.88e12

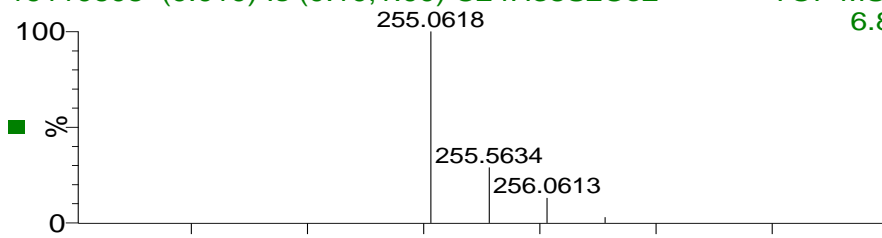

19110608 42 (0.414) AM (Cen,2, 80.00, Ht,5000.0,0.00,1.00); Sm (Mn, 356

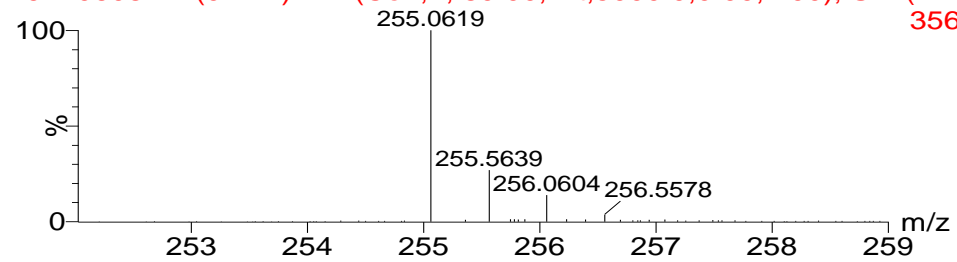

**Fig. S19** ESI-HRMS of **5** in CH<sub>2</sub>Cl<sub>2</sub>.

(a) The signal at  $m/z = 567.1686$  corresponds to [**5**-PF<sub>6</sub>]<sup>+</sup>. (b) Calculated isotopic distribution for [**5**-PF<sub>6</sub>]<sup>+</sup> (upper) and the amplifying diagram for [**5**-PF<sub>6</sub>]<sup>+</sup> (bottom).

(a)

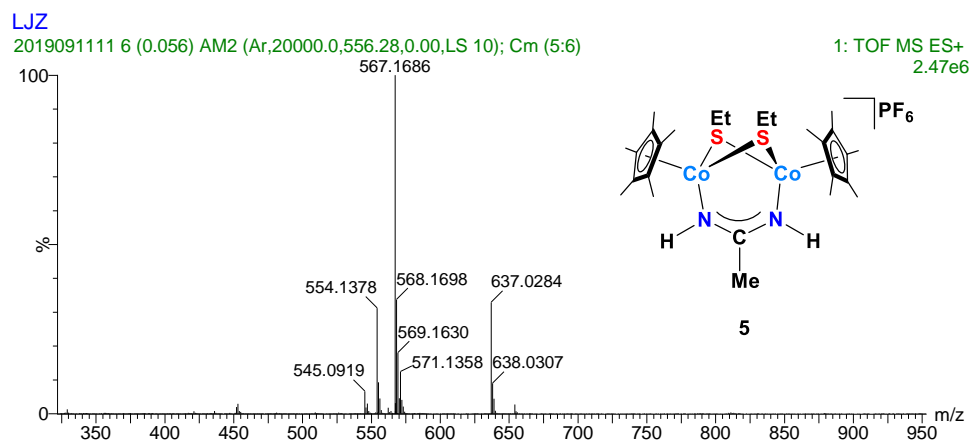

(b)

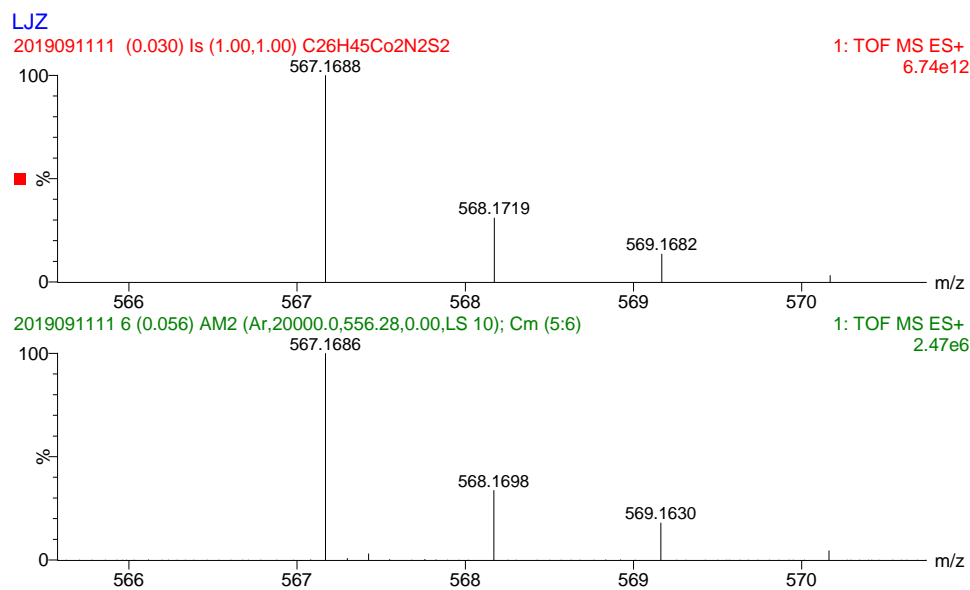

**Fig. S20** ESI-HRMS of acetamidinium tetrafluoroborate in CH<sub>2</sub>Cl<sub>2</sub>.

The signal at an  $m/z = 59.0609$  corresponds to [MeC(NH<sub>2</sub>)NH<sub>2</sub>]<sup>+</sup>.

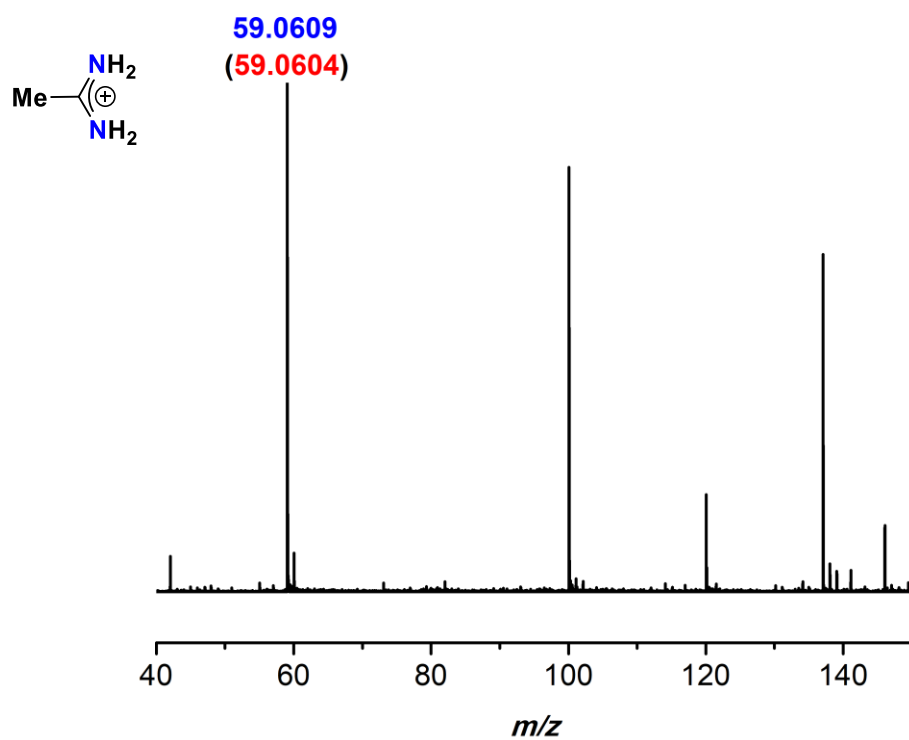

## IV. IR spectra

Fig. S21 The IR (KBr) spectrum of 2.

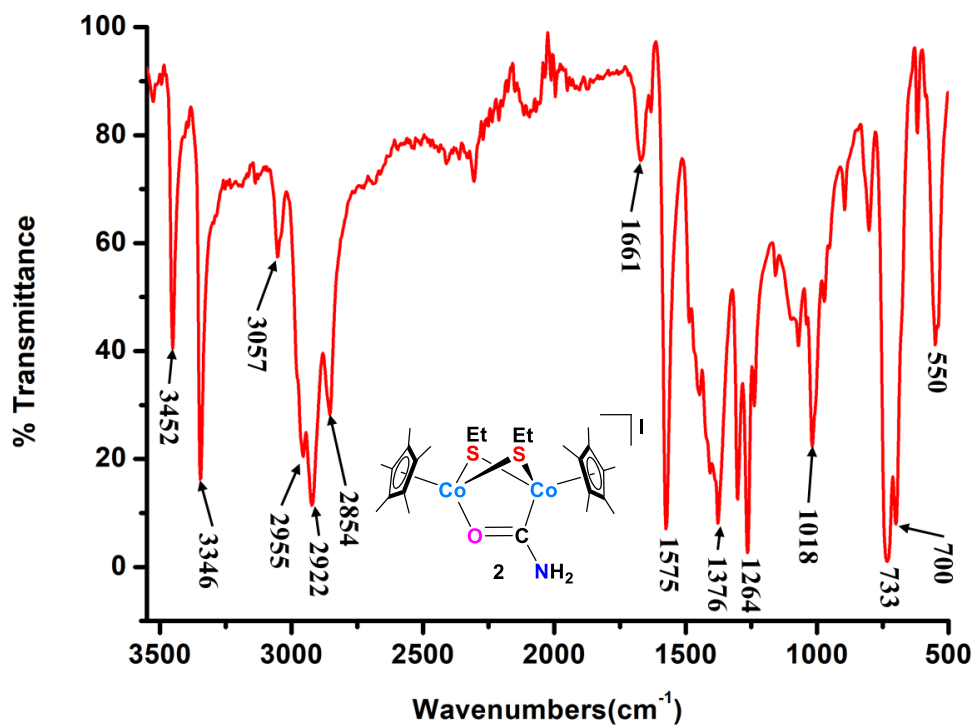

Fig. S22 The IR (KBr) spectrum of 3.

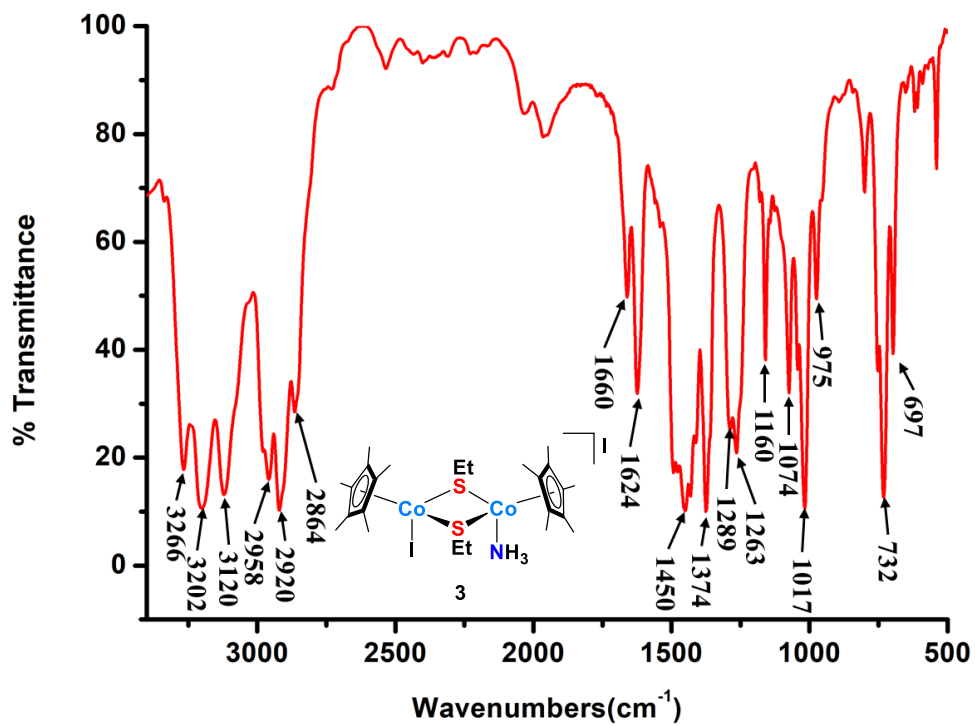

Fig. S23 The IR (KBr) spectrum of D-3.

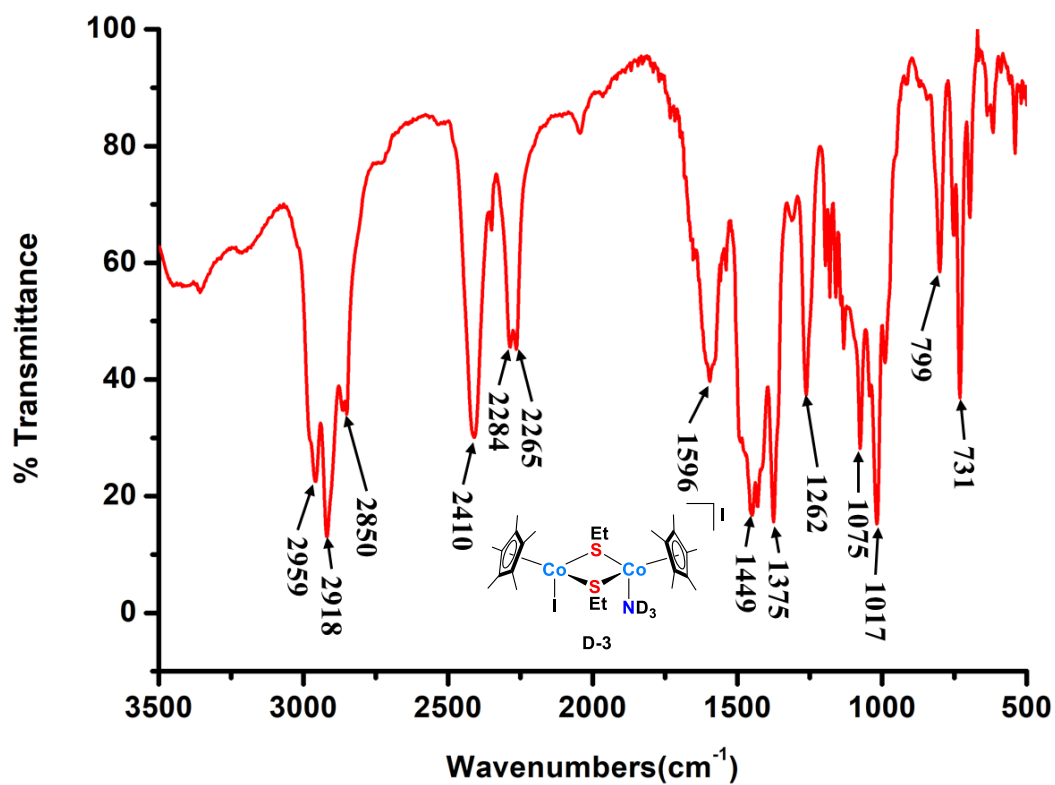

Fig. S24 The IR (KBr) spectrum of 4.

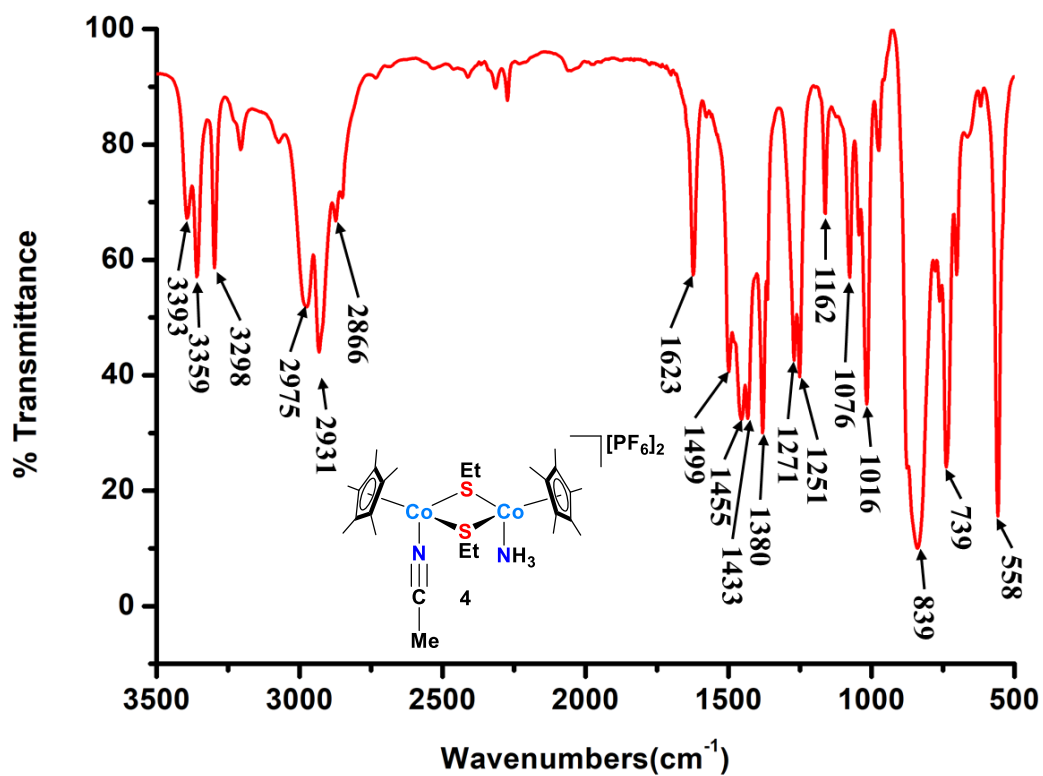

Fig. S25 The IR (KBr) spectrum of D-4.

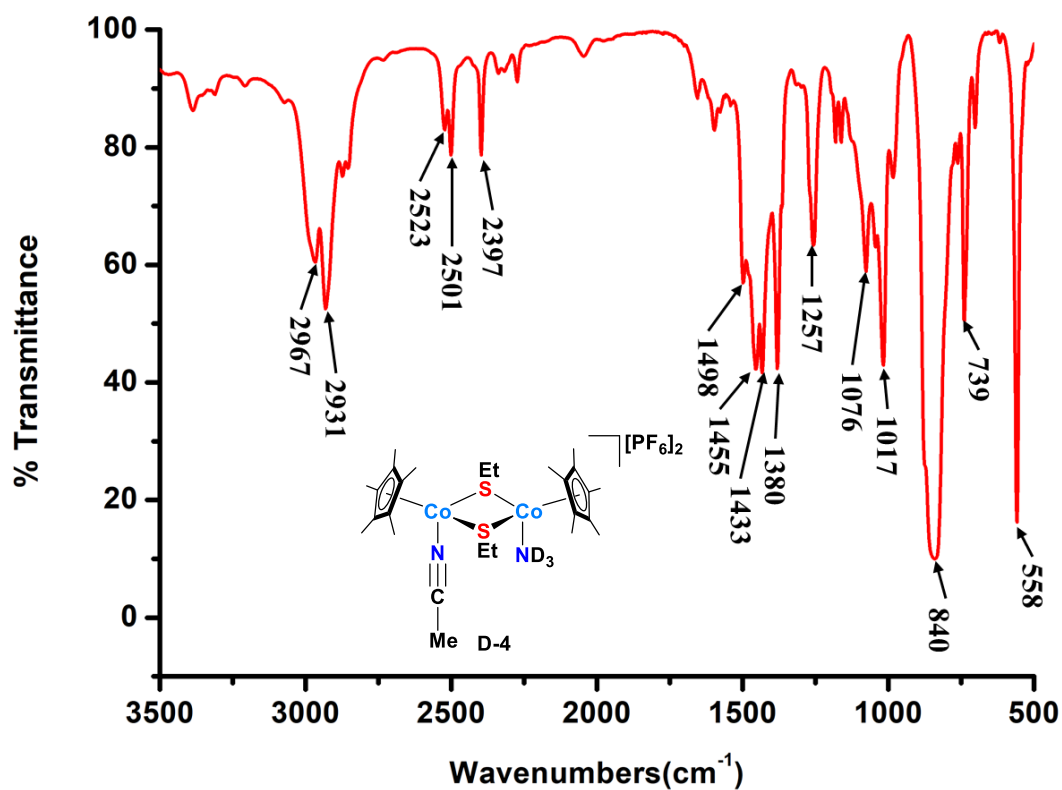

Fig. S26 The IR (KBr) spectrum of 5.

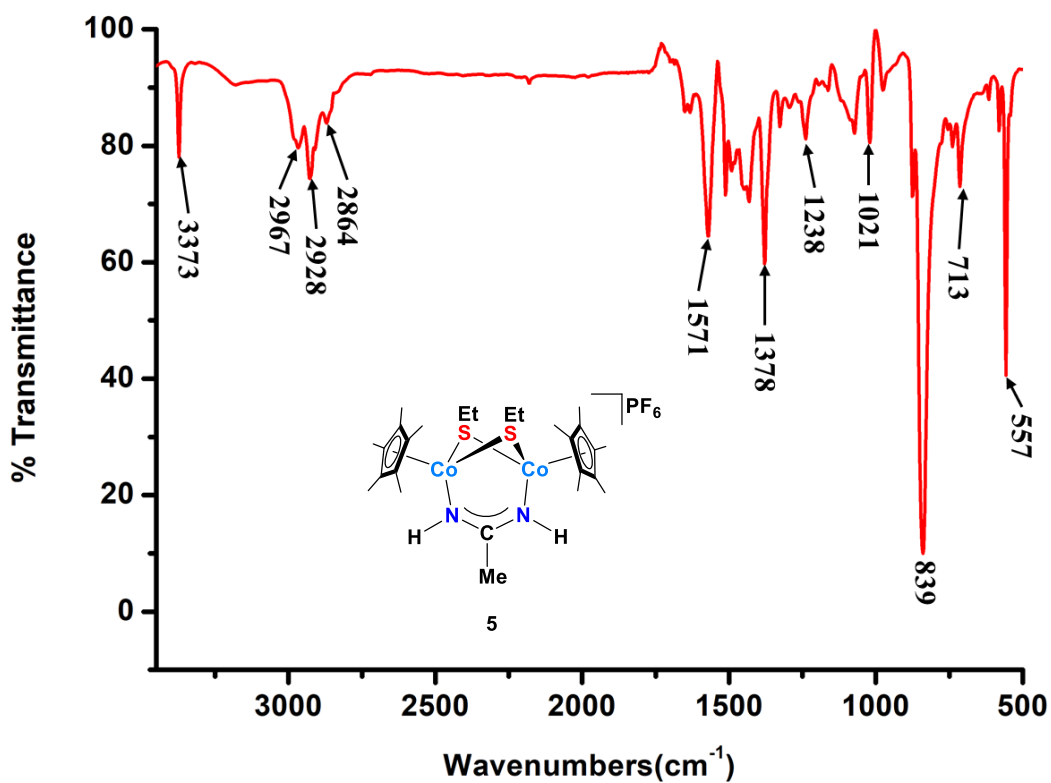

Supplement: d0dt02133d1.pdf [file d0dt02133d1.pdf]
